# Supplementary material for: Genome sequencing of Syzygium cumini (jamun) reveals adaptive evolution in secondary metabolism pathways associated with its medicinal properties
Source: Front Plant Sci. 2023 Nov 17;14:1260414. doi: 10.3389/fpls.2023.1260414 (PMC10693344; doi:10.3389/fpls.2023.1260414)
Supplement: Supplementary file 2 [file Table_1.xlsx]

## Sheet: Sheet1
Supplementary Data 1: List of MSA genes (TPM > 1) to which KO IDs could be assigned
KO ID	Gene name
Biosynthesis of secondary metabolites
K00208	fabI; enoyl-[acyl-carrier protein] reductase I [EC:1.3.1.9 1.3.1.10]
K00222	TM7SF2; Delta14-sterol reductase [EC:1.3.1.70]
K00454	LOX2S; lipoxygenase [EC:1.13.11.12]
K00660	CHS; chalcone synthase [EC:2.3.1.74]
K00688	PYG; glycogen phosphorylase [EC:2.4.1.1]
K00696	Sucrose-phosphate synthase [EC:2.4.1.14]
K00850	pfkA; 6-phosphofructokinase 1 [EC:2.7.1.11]
K01115	PLD1_2; phospholipase D1/2 [EC:3.1.4.4]
K01188	BGLU; beta-glucosidase [EC:3.2.1.21]
K01626	3-deoxy-7-phosphoheptulonate synthase [EC:2.5.1.54]
K01693	hisB; imidazoleglycerol-phosphate dehydratase [EC:4.2.1.19]
K01885	EARS; glutamyl-tRNA synthetase [EC:6.1.1.17]
K02291	crtB; 15-cis-phytoene synthase [EC:2.5.1.32]
K02548	menA; 1,4-dihydroxy-2-naphthoate polyprenyltransferase [EC:2.5.1.74]
K05278	FLS; flavonol synthase [EC:1.14.20.6]
K09753	CCR; cinnamoyl-CoA reductase [EC:1.2.1.44]
K09755	CYP84A; ferulate-5-hydroxylase [EC:1.14.-.-]
K12501	HST; homogentisate solanesyltransferase [EC:2.5.1.117]
K13222	BX1; indole-3-glycerol-phosphate lyase [EC:4.1.2.8]
K14455	GOT2; aspartate aminotransferase [EC:2.6.1.1]
K14652	ribBA; 3,4-dihydroxy 2-butanone 4-phosphate synthase / GTP cyclohydrolase II [EC:4.1.99.12 3.5.4.25]
K15892	FOLK; farnesol kinase [EC:2.7.1.216]
K18121	GLYR; glyoxylate/succinic semialdehyde reductase [EC:1.1.1.79 1.1.1.-]
K18532	AK6; adenylate kinase [EC:2.7.4.3]
K19073	DVR; divinyl chlorophyllide a 8-vinyl-reductase [EC:1.3.1.75]
K21568	PLR; pinoresinol/lariciresinol reductase [EC:1.23.1.1 1.23.1.2 1.23.1.3 1.23.1.4]
Metabolic pathways
K00759	APRT; adenine phosphoribosyltransferase [EC:2.4.2.7]
K00856	ADK; adenosine kinase [EC:2.7.1.20]
K00864	glpK; glycerol kinase [EC:2.7.1.30]
K00876	udk; uridine kinase [EC:2.7.1.48]
K00889	PIP5K; 1-phosphatidylinositol-4-phosphate 5-kinase [EC:2.7.1.68]
K00921	PIKFYVE; 1-phosphatidylinositol-3-phosphate 5-kinase [EC:2.7.1.150]
K00979	kdsB; 3-deoxy-manno-octulosonate cytidylyltransferase (CMP-KDO synthetase) [EC:2.7.7.38]
K01082	cysQ; 3'(2'), 5'-bisphosphate nucleotidase [EC:3.1.3.7]
K01251	AHCY; adenosylhomocysteinase [EC:3.13.2.1]
K01433	purU; formyltetrahydrofolate deformylase [EC:3.5.1.10]
K01488	Adenosine deaminase [EC:3.5.4.4]
K01595	ppc; phosphoenolpyruvate carboxylase [EC:4.1.1.31]
K01886	QARS; glutaminyl-tRNA synthetase [EC:6.1.1.18]
K01897	ACSL; long-chain acyl-CoA synthetase [EC:6.2.1.3]
K01969	E6.4.1.4B; 3-methylcrotonyl-CoA carboxylase beta subunit [EC:6.4.1.4]
K02154	ATPeV0A; V-type H+-transporting ATPase subunit a
K04716	SGPP1; sphingosine-1-phosphate phosphatase 1 [EC:3.1.3.-]
K05857	PLCD; phosphatidylinositol phospholipase C, delta [EC:3.1.4.11]
K07408	CYP1A1; cytochrome P450 family 1 subfamily A1 [EC:1.14.14.1]
K11147	DHRS4; dehydrogenase/reductase SDR family member 4 [EC:1.1.-.-]
K13366	MPAO; polyamine oxidase [EC:1.5.3.14 1.5.3.16 1.5.3.-]
K13510	LPCAT1_2; lysophosphatidylcholine acyltransferase / lyso-PAF acetyltransferase [EC:2.3.1.23 2.3.1.67]
K13648	GAUT; alpha-1,4-galacturonosyltransferase [EC:2.4.1.43]
K16054	DEP1; methylthioribulose 1-phosphate dehydratase / enolase-phosphatase E1 [EC:4.2.1.109 3.1.3.77]
K16329	psuG; pseudouridylate synthase [EC:4.2.1.70]
K17108	GBA2; non-lysosomal glucosylceramidase [EC:3.2.1.45]
K19801	PI4KB; phosphatidylinositol 4-kinase B [EC:2.7.1.67]
Plant hormone signal transduction
K14432	ABF; ABA responsive element binding factor
K14486	ARF; auxin response factor
K14489	AHK2_3_4; arabidopsis histidine kinase 2/3/4 (cytokinin receptor) [EC:2.7.13.3]
K14500	BSK; BR-signaling kinase [EC:2.7.11.1]
K14508	NPR1; regulatory protein NPR1
Spliceosome
K12815	DHX38; pre-mRNA-splicing factor ATP-dependent RNA helicase DHX38/PRP16 [EC:3.6.4.13]
K12817	PRPF18; pre-mRNA-splicing factor 18
K12856	PRPF8; pre-mRNA-processing factor 8
K12866	WBP11; WW domain-binding protein 11
K12897	TRA2; transformer-2 protein
Ribosome
K02945	RP-S1; small subunit ribosomal protein S1
K02966	RP-S19e; small subunit ribosomal protein S19e
K02991	RP-S6e; small subunit ribosomal protein S6e
Protein processing in endoplasmic reticulum
K09584	PDIA6; protein disulfide-isomerase A6 [EC:5.3.4.1]
K10839	RAD23; UV excision repair protein RAD23
K13250	SSR2; translocon-associated protein subunit beta
K14015	NPLOC4; nuclear protein localization protein 4
Ubiquitin mediated proteolysis
K04506	SIAH1; E3 ubiquitin-protein ligase SIAH1 [EC:2.3.2.27]
K10598	PPIL2; peptidyl-prolyl cis-trans isomerase-like 2 [EC:5.2.1.8]
RNA degradation
K12581	CNOT7_8; CCR4-NOT transcription complex subunit 7/8
K13126	PABPC; polyadenylate-binding protein
ABC transporters
K05658	ABCB1; ATP-binding cassette, subfamily B (MDR/TAP), member 1 [EC:7.6.2.2]
K05666	ABCC2; ATP-binding cassette, subfamily C (CFTR/MRP), member 2
Nucleocytoplasmic transport
K14311	NUP188; nuclear pore complex protein Nup188
K15436	TRPO3; transportin-3
Proteasome
K02739	PSMB7; 20S proteasome subunit beta 2 [EC:3.4.25.1]
K03037	PSMD6; 26S proteasome regulatory subunit N7
K03039	PSMD13; 26S proteasome regulatory subunit N9
Cellular senescence
K06268	PPP3R; serine/threonine-protein phosphatase 2B regulatory subunit
K06269	PPP1C; serine/threonine-protein phosphatase PP1 catalytic subunit [EC:3.1.3.16]
Circadian rhythm - plant
K12124	GI; GIGANTEA
K16240	SPA1; protein suppressor of PHYA-105 1
Others
K00586	DPH5; diphthine methyl ester synthase [EC:2.1.1.314]
K00599	METTL6; tRNA N(3)-methylcytidine methyltransferase METTL6 [EC:2.1.1.-]
K00784	rnz; ribonuclease Z [EC:3.1.26.11]
K00924	E2.7.1.-; kinase [EC:2.7.1.-]
K01102	PDP; pyruvate dehydrogenase phosphatase [EC:3.1.3.43]
K21767	TBCD; tubulin-specific chaperone D
K01530	Phospholipid-translocating ATPase [EC:7.6.2.1]
K01533	copB; P-type Cu2+ transporter [EC:7.2.2.9]
K01537	ATP2C; P-type Ca2+ transporter type 2C [EC:7.2.2.10]
K01551	arsA; arsenite/tail-anchored protein-transporting ATPase [EC:7.3.2.7 7.3.-.-]
K01880	GARS; glycyl-tRNA synthetase [EC:6.1.1.14]
K02835	prfA; peptide chain release factor 1
K02836	prfB; peptide chain release factor 2
K03109	SRP9; signal recognition particle subunit SRP9
K03131	TAF6; transcription initiation factor TFIID subunit 6
K03294	TC.APA; basic amino acid/polyamine antiporter, APA family
K03452	MHX; magnesium/proton exchanger
K03453	TC.BASS; bile acid:Na+ symporter, BASS family
K03549	kup; KUP system potassium uptake protein
K03574	mutT; 8-oxo-dGTP diphosphatase [EC:3.6.1.55]
K03665	hflX; GTPase
K03671	trxA; thioredoxin 1
K03676	grxC; glutaredoxin 3
K04773	sppA; protease IV [EC:3.4.21.-]
K05391	CNGC; cyclic nucleotide gated channel, plant
K05750	NCKAP1; NCK-associated protein 1
K05761	VIL1; villin 1
K05909	Laccase [EC:1.10.3.2]
K05929	Phosphoethanolamine N-methyltransferase [EC:2.1.1.103]
K05956	RABGGTB; geranylgeranyl transferase type-2 subunit beta [EC:2.5.1.60]
K06268	PPP3R; serine/threonine-protein phosphatase 2B regulatory subunit
K06901	pbuG; adenine/guanine/hypoxanthine permease
K06990	MEMO1; MEMO1 family protein
K07199	PRKAB; 5'-AMP-activated protein kinase, regulatory beta subunit
K07300	chaA; Ca2+:H+ antiporter
K07393	ECM4; glutathionyl-hydroquinone reductase [EC:1.8.5.7]
K07999	MMP20; matrix metalloproteinase-20 (enamelysin) [EC:3.4.24.-]
K08332	VAC8; vacuolar protein 8
K08337	ATG7; ubiquitin-like modifier-activating enzyme
K08342	ATG4; cysteine protease [EC:3.4.22.-]
K08472	MLO; mlo protein
K08835	OXSR1; serine/threonine-protein kinase OSR1/STK39 [EC:2.7.11.1]
K08869	ADCK; aarF domain-containing kinase
K09008	NDUFAF3; NADH dehydrogenase [ubiquinone] 1 alpha subcomplex assembly factor 3
K09285	OVM; AP2-like factor, ANT lineage
K09313	CUTL; homeobox protein cut-like
K09338	HD-ZIP; homeobox-leucine zipper protein
K09419	HSFF; heat shock transcription factor, other eukaryote
K09494	CCT2; T-complex protein 1 subunit beta
K09531	DNAJC11; DnaJ homolog subfamily C member 11
K09613	COPS5; COP9 signalosome complex subunit 5 [EC:3.4.-.-]
K10355	ACTF; actin
K10598	PPIL2; peptidyl-prolyl cis-trans isomerase-like 2 [EC:5.2.1.8]
K10859	ALKBH2; DNA oxidative demethylase [EC:1.14.11.33]
K10999	CESA; cellulose synthase A [EC:2.4.1.12]
K11000	CALS; callose synthase [EC:2.4.1.-]
K11136	RTEL1; regulator of telomere elongation helicase 1 [EC:5.6.2.3]
K11663	ZNHIT1; zinc finger HIT domain-containing protein 1
K11671	NFRKB; nuclear factor related to kappa-B-binding protein
K11801	DCAF11; DDB1- and CUL4-associated factor 11
K12737	SDCCAG10; peptidyl-prolyl cis-trans isomerase [EC:5.2.1.8]
K13863	SLC7A1; solute carrier family 7 (cationic amino acid transporter), member 1
K14164	glyQS; glycyl-tRNA synthetase [EC:6.1.1.14]
K14168	CTU1; cytoplasmic tRNA 2-thiolation protein 1 [EC:2.7.7.-]
K14553	UTP18; U3 small nucleolar RNA-associated protein 18
K14558	PWP2; periodic tryptophan protein 2
K14777	DDX47; ATP-dependent RNA helicase DDX47/RRP3 [EC:3.6.4.13]
K14803	PTC2_3; protein phosphatase PTC2/3 [EC:3.1.3.16]
K14838	NOP15; nucleolar protein 15
K14864	FTSJ1; tRNA (cytidine32/guanosine34-2'-O)-methyltransferase [EC:2.1.1.205]
K15084	SLC25A16; solute carrier family 25 (mitochondrial carrier protein), member 16
K15128	MED6; mediator of RNA polymerase II transcription subunit 6
K15186	EAF; ELL-associated factor
K15688	MUL1; E3 ubiquitin-protein ligase [EC:2.3.2.27]
K16280	RGLG; E3 ubiquitin-protein ligase [EC:2.3.2.27]
K16547	NEDD1
K16587	HAUS4; HAUS augmin-like complex subunit 4
K17338	REEP1_2_3_4; receptor expression-enhancing protein 1/2/3/4
K17609	NXN; nucleoredoxin [EC:1.8.1.8]
K18442	ARFGEF; brefeldin A-inhibited guanine nucleotide-exchange protein
K18873	PIK1; pathogen-induced protein kinase
K19045	BB; E3 ubiquitin-protein ligase BIG BROTHER [EC:2.3.2.27]
K19365	BSCL2; seipin
K19533	SYCP1; synaptonemal complex protein 1
K19882	NOTUM; O-palmitoleoyl-L-serine hydrolase [EC:3.1.1.98]
K20028	ZDHHC2_15_20; palmitoyltransferase ZDHHC2/15/20 [EC:2.3.1.225]
K20032	ZDHHC13_17; palmitoyltransferase ZDHHC13/17 [EC:2.3.1.225]
K20241	WDR44; WD repeat-containing protein 44
K20285	RABEPK; Rab9 effector protein with kelch motifs
K20347	TMED2; p24 family protein beta-1
K20536	MPK3; mitogen-activated protein kinase 3 [EC:2.7.11.24]
K20720	RTN4; reticulon-4
K20783	RRA; arabinosyltransferase [EC:2.4.2.-]
K20823	NAA35; N-alpha-acetyltransferase 35, NatC auxiliary subunit
K20869	IRX9; putative beta-1,4-xylosyltransferase [EC:2.4.2.-]
K20891	GLCAT14; beta-glucuronosyltransferase [EC:2.4.1.-]
K20899	GBP1_3_4_7; guanylate-binding protein 1/3/4/7
K21594	GUF1; translation factor GUF1, mitochondrial [EC:3.6.5.-]
K21813	ENDOV; endonuclease V [EC:3.1.26.-]
K21989	TMEM63; calcium permeable stress-gated cation channel
K22048	MSL4S; mechanosensitive ion channel protein 4/5/6/7/8/9/10
K22381	ZNF598; E3 ubiquitin-protein ligase [EC:2.3.2.27]
K22390	ACP7; acid phosphatase type 7

## Sheet: Sheet2
Supplementary Data 1: Arabidopsis orthologs of the MSA genes (TPM > 1) to which KO IDs were not assigned
*obtained from TAIR database
AT IDs	Gene name/description*
AT1G29400	Mei2-like protein 5 (ML5)
AT2G25660	Embryo Defective 2410 (EMB2410)
AT1G24120	ARG1-like 1 (ARL1)
AT4G16380	Heavy metal associated protein 35 (HMP35)
AT1G07280	Tetratricopeptide repeat (TPR)-like superfamily protein
AT3G24800	Proteolysis 1 (PRT1)
AT5G48910	Low PSII accumulation 66 (LPA66)
AT1G55240	Proteinase inhibitor I4, serpin (DUF716)
AT1G08480	Succinate dehydrogenase 6 (SDH6)
AT2G33990	IQ-domain 9 (IQD9)
AT5G50390	Pentatricopeptide repeat (PPR-like) superfamily protein
AT5G14410	Hypothetical protein
AT2G31880	Evershed (EVR)/Suppressor of BIR1 1 (SOBIR1)
AT5G06570	Alpha/beta-Hydrolases superfamily protein
AT4G28706	pfkB-like carbohydrate kinase family protein
AT5G11500	Coiled-coil protein
AT4G01810	ATSEC23A
AT2G27680	Oxidoreductase
AT5G49320	Transmembrane protein, putative (DUF1218)
AT3G52960	Peroxiredoxin-II-E (PRXIIE)
AT4G29800	Patatin-like protein 8 (PLP8)
AT2G21650	Arabidopsis RAD-like 2 (ATRL2)
AT4G30780	ATP-dependent DNA helicase
AT4G19040	Enhanced disease resistance 2 (EDR2)
AT5G02190	Arabidopsis thaliana aspartic protease 38 (ASP38)
AT1G31130	Polyadenylate-binding protein 1-B-binding protein
AT1G32520	Oxidation resistance 4 (OXR4)
AT5G27030	Topless-related 3 (TPR3)
AT1G15360	Shine 1 (SHN1)/Wax inducer 1 (WIN1)
AT5G39350	Tetratricopeptide repeat (TPR)-like superfamily protein
AT3G16910	Acetate non-utilizing 1
AT4G12060	CLPT2
AT1G11380	PLAC8 family protein
AT1G74780	Nodulin-like / Major Facilitator Superfamily protein
AT1G77410	Beta-galactosidase 16
AT3G09010	Protein kinase superfamily protein
AT2G27230	Lonesome highway (LHW)
AT1G26870	Arabidopsis NAC domain containing protein 9 (ANAC009)
AT3G18440	ALMT9, ALUMINUM-ACTIVATED MALATE TRANSPORTER 9
AT3G54360	No catalase activity 1 (NCA1)
AT2G25270	Transmembrane protein
AT1G10700	Phosphoribosyl pyrophosphate (PRPP) synthase 3 (PRS3)
AT3G07660	Flocculation protein (DUF1296)
AT3G26440	Transmembrane protein, putative (DUF707)
AT3G03610	Engulfment and cell motility (ELMO) domain F (ELMOD_F)
AT3G52570	Alpha/beta-Hydrolases superfamily protein
AT2G46000	LDL receptor wingless signaling/trafficking chaperone
AT1G17210	IAP-like protein 1 (ILP1)
AT2G46710	ROP Guanosine triphosphatase (GTPASE)-activating protein 3 (ROPGAP3)
AT5G37290	ARM repeat superfamily protein
AT1G31770	ATP-Binding Cassette G14
AT5G27970	ARM repeat superfamily protein
AT5G54240	Membrane lipoprotein lipid attachment site-like protein, putative (DUF1223)
AT3G47160	RING/U-box superfamily protein
AT1G75210	HAD-superfamily hydrolase, subfamily IG, 5-nucleotidase
AT5G63140	Purple acid phosphatase 29 (PAP29)
AT2G20760	Clathrin light 62 chain 1 (CLC1)
AT3G15120	BRAT1 partner 1 (BRP1)
AT3G15351	P53/DNA damage-regulated protein
AT5G20610	Plastid movement impaired 1-related 1 (PMIR1)
AT5G67140	F-box/RNI-like superfamily protein
AT2G30933	Carbohydrate-binding X8 domain superfamily protein
AT2G31740	S-adenosyl-L-methionine-dependent methyltransferases superfamily protein
AT2G47710	Adenine nucleotide alpha hydrolases-like superfamily protein
AT1G69330	RING/U-box superfamily protein
AT3G24460	Serinc-domain containing serine and sphingolipid biosynthesis protein
AT5G26610	D111/G-patch domain-containing protein
AT3G54460	SNF2 domain-containing protein / helicase domain-containing protein / F-box family protein
AT5G55540	Lopped 1 (LOP1)/Tornado 1 (TRN1)
AT5G49945	Hypothetical protein (DUF1682)
AT1G68140	Zinc finger/BTB domain protein, putative (DUF1644)
AT5G62570	Calmodulin-binding protein 60A (CBP60A)
AT5G11700	Ephrin type-B receptor
AT5G18820	Chaperonin-60Alpha2
AT3G26710	Cofactor assembly of complex C (CCB1)
AT5G64250	Aldolase-type TIM barrel family protein
AT3G07900	O-fucosyltransferase family protein
AT5G54090	DNA mismatch repair protein MutS, type 2
AT2G46980	Asynaptic 3 (ASY3)
AT3G57400	Transmembrane protein
AT1G31300	TRAM, LAG1 and CLN8 (TLC) lipid-sensing domain containing protein
AT3G59770	Suppressor of actin 9 (SAC9)
AT4G36850	PQ-loop repeat family protein / transmembrane family protein
AT2G39830	DA1-related protein 2 (DAR2)/Lateral root development 3 (LRD3)
AT4G12980	Auxin-responsive family protein gene DEG18
AT4G00090	Transducin/WD40 repeat-like superfamily protein
AT3G61050	Calcium-dependent lipid-binding protein (CLB1)
AT1G51140	ABA-responsive kinase substrate 1 (AKS1)
AT1G55320	Acyl-activating enzyme 18 (AAE18)
AT1G80240	DUF642 L-Gall responsive gene 1 (DGR1)
AT3G27960	Kinesin light chain-related 2 (KLCR2)
AT5G20840	Suppressor of actin 4 (SAC4)
AT4G33780	ATP phosphoribosyltransferase regulatory subunit
AT3G44190	FAD/NAD(P)-binding oxidoreductase family protein
AT1G11170	Lysine ketoglutarate reductase trans-splicing-like protein (DUF707)
AT1G67340	HCP-like superfamily protein with MYND-type zinc finger
AT5G45160	RHD-like 2 (RL2)
AT3G30300	O-fucosyltransferase family protein
AT2G18240	Rer1 family protein
AT4G08310	DNA ligase
AT5G19380	CRT (Chloroquine-Resistance Transporter)-like transporter 1 (CLT1)
AT1G42430	Early starvation 1 (ESV1)
AT3G20720	Amino-terminal region of chorein
AT2G30880	Pleckstrin homology (PH) domain-containing protein
AT3G06290	SAC3 homolog B
AT2G03510	SPFH/Band 7/PHB domain-containing membrane-associated protein family
AT3G05420	Acyl-CoA binding protein 4 (ACBP4)
AT2G26660	SPX domain gene 2 (SPX2)
AT5G58160	Formin homology 13 (FH13)
AT5G15890	Trichome birefringence-like 21 (TBL21)
AT4G31800	WRKY DNA-binding protein 18 (WRKY18)
AT1G64300	Mixed lineage kinase like 1 (MLKL1)
AT5G61960	Mei2-like protein 1 (ML1)
AT1G14770	RING/FYVE/PHD zinc finger superfamily protein
AT1G76660	Hydroxyproline-rich glycoprotein family protein
AT5G06340	Nudix hydrolase homolog 27 (NUDX27)
AT1G23880	NHL domain-containing protein
AT1G16860	SHOU4L
AT1G78240	Tumorous shoot development 2 (TSD2)
AT4G16180	Transmembrane protein
AT5G20935	Chlororespiratory reduction 42 (CRR42)
AT1G34320	PSK simulator 1 (PSI1)
AT3G07060	Embryo defective 1974 (EMB1974)
AT5G39790	Protein targeting to starch (PTST)
AT1G76950	PRAF/RLD family of proteins
AT1G28340	Receptor like protein 4 (RLP4)
AT5G21960	Ethylene response factor 016 (ERF016)
AT1G44835	YbaK/aminoacyl-tRNA synthetase-associated domain-containing protein
