# Supplementary material for: Genome sequencing of Syzygium cumini (jamun) reveals adaptive evolution in secondary metabolism pathways associated with its medicinal properties
Source: Front Plant Sci. 2023 Nov 17;14:1260414. doi: 10.3389/fpls.2023.1260414 (PMC10693344; doi:10.3389/fpls.2023.1260414)
Supplement: Supplementary file 3 [file Table_2.xlsx]

## Sheet: Sheet1
Supplementary Data 2: List of MSA genes (TPM > 1) involved in stress tolerance responses
KO ID	Gene name	Role in biotic stress tolerance	Role in abiotic stress tolerance
K00454	LOX2S; lipoxygenase	Yes	Yes
K00660	CHS; chalcone synthase	Yes	Yes
K01115	PLD1_2; phospholipase D1/2	Yes	Yes
K01188	BGLU; beta-glucosidase	Yes	-
K05278	FLS; flavonol synthase	-	Yes
K09753	CCR; cinnamoyl-CoA reductase	Yes	Yes
K13222	BX1; indole-3-glycerol-phosphate lyase	Yes	-
K18121	GLYR; glyoxylate/succinic semialdehyde reductase	-	Yes
K00856	ADK; adenosine kinase	Yes	-
K05857	PLCD; phosphatidylinositol phospholipase C, delta	Yes	-
K13366	MPAO; polyamine oxidase	Yes	Yes
K19801	PI4KB; phosphatidylinositol 4-kinase B	Yes	Yes
K14432	ABF; ABA responsive element binding factor	-	Yes
K14486	ARF; auxin response factor	Yes	Yes
K14500	BSK; BR-signaling kinase	Yes	-
K14508	NPR1; regulatory protein NPR1	Yes	-
K12866	WBP11; WW domain-binding protein 11	Yes	-
K06268	PPP3R; serine/threonine-protein phosphatase 2B regulatory subunit	Yes	Yes
K12124	GI; GIGANTEA	Yes	Yes
K03549	kup; KUP system potassium uptake protein	-	Yes
K03671	trxA; thioredoxin 1	Yes	Yes
K03676	grxC; glutaredoxin 3	Yes	Yes
K05391	CNGC; cyclic nucleotide gated channel	Yes	Yes
K05761	VIL1; villin 1	Yes	Yes
K05909	Laccase	Yes	-
K05929	phosphoethanolamine N-methyltransferase	-	Yes
K05956	RABGGTB; geranylgeranyl transferase type-2 subunit beta	Yes	-
K06268	PPP3R; serine/threonine-protein phosphatase 2B regulatory subunit	Yes	Yes
K07300	chaA; Ca2+:H+ antiporter	Yes	Yes
K08342	ATG4; cysteine protease	Yes	Yes
K08472	MLO; mlo protein	Yes	-
K09285	OVM; AP2-like factor, ANT lineage	-	Yes
K09419	HSFF; heat shock transcription factor	Yes	Yes
K09613	COPS5; COP9 signalosome complex subunit 5	Yes	-
K10598	PPIL2; peptidyl-prolyl cis-trans isomerase-like 2	Yes	-
K11000	CALS; callose synthase	Yes	-
K11663	ZNHIT1; zinc finger HIT domain-containing protein 1	Yes	Yes
K15688	MUL1; E3 ubiquitin-protein ligase	-	Yes
K16280	RGLG; E3 ubiquitin-protein ligase	-	Yes
K17609	NXN; nucleoredoxin	-	Yes
K18873	PIK1; pathogen-induced protein kinase	Yes	-
K19045	BB; E3 ubiquitin-protein ligase BIG BROTHER	-	Yes
K20028	ZDHHC2_15_20; palmitoyltransferase ZDHHC2/15/20	Yes	Yes
K20032	ZDHHC13_17; palmitoyltransferase ZDHHC13/17	Yes	Yes
K20536	MPK3; mitogen-activated protein kinase 3	Yes	Yes
K20720	RTN4; reticulon-4	Yes	-
K20783	RRA; arabinosyltransferase	Yes	-
K21989	TMEM63; calcium permeable stress-gated cation channel	Yes	Yes
K22048	MSL4S; mechanosensitive ion channel protein	Yes	Yes
K22381	ZNF598; E3 ubiquitin-protein ligase	-	Yes
